# Supplementary material for: Structural insights and biomedical potential of biosynthesized silver nanoparticles: antibacterial activity, anti-biofilm and cancer cell inhibition
Source: PeerJ. 2025 Jul 1;13:e19608. doi: 10.7717/peerj.19608 (PMC12226986; doi:10.7717/peerj.19608)
Supplement: Supplemental Information 1 [file peerj-13-19608-s001.xls]

## Sheet: pseudo Aerig
Value	c-	c+	ATB	[5 mg/ml]	[2,5 mg/ml]	[1,25 mg/ml]	[0,625 mg/ml]	[0,312 mg/ml]	[0,156 mg/ml]	[0,078mg/ml]	[0,039mg/ml]	[0,019 mg/ml]
A	0.161697	1.36919	0.504954	0.33236	0.550458	0.707384	0.684095	1.04754	0.987633	1.35436	1.58382	1.03921	CuO	EG			Pg		TP		TM
B	0.169135	1.34039	0.511565	0.35191	0.538258	0.991125	0.816713	1.74047	1.27564	1.79704	1.5805	0.934463	CuO	EG		cc (mg/mL)	%	SD	%	SD	%	SD
C	0.164563	1.3642	0.500825	0.316361	0.433031	0.846268	1.08345	1.38835	2.23541	1.06524	1.04174	1.15968	CuO	EG		0.019
D	0.16278	0.57141	0.466089	0.3258	0.550268	0.653973	0.905082	1.02061	2.24619	2.06698	1.61546	0.939342	CuO	EG		0.039	0.552959	0.449374	10.7094	0.764076	18.7588	4.37447
E	0.167159	0.749731	0.516046	0.345677	0.629097	1.01858	1.23653	1.47393	2.39189	2.16782	1.43559	1.00174	AgNPs	EG		0.078	1.58965	0.0567485	75.7081	4.97656	18.4242	2.41657
F	0.210404	1.22986	0.429142	0.40149	0.605044	1.35106	0.959706	1.18236	3.25147	2.49979	1.04571	1.02714	AgNPs	EG		0.156	7.36221	2.21591	93.1365	3.86575	20.1111	0.495999
G	0.178442	0.971471	0.404897	0.304933	0.639828	0.941658	1.16557	1.39039	1.23581	1.21897	1.04515	1.12797	AgNPs	EG		0.312	11.9962	1.52341	97.3086	5.39948	31.5802	8.78884
H	0.167301	1.3	0.459829	0.429261	4.49253	0.790702	0.996967	4.21292	1.76184	1.40973	1.68312	0.912987	AgNPs	EG		0.625	29.6846	3.3283	97.3776	6.59479	44.9079	6.22406
moyenne pour AgNPs	0.167297	1.32073	0.452479	0.37034	0.624656	0.86618	0.978336	1.18236	1.23581	1.31435	1.30239	1.05228				1.25	39.4083	4.85641	98.9323	2.03451	44.4861	1.51715
		1.15343	0.285182	0.203044	0.45736	0.698883	0.81104	1.01506	1.06851	1.14705	1.1351	0.884987				2.5	60.3479	2.37621	99.2116	0.758276	88.1449	7.50594
inhibition %			75.2754	82.3966	60.3479	39.4083	29.6846	11.9962	7.36221	0.552959	1.58965	23.2736				5	82.3966	4.36903	99.3873	1.97888	95.202	7.51922
ecartype			0.0275289	0.0196371	0.024596	0.106742	0.109693	0.150149	0.371959	0.134888	0.368171	0.10756				CHL	82.207	6.60191
moy/ecrtyp			16.4365	18.8592	25.3967	8.11471	8.91886	7.87457	3.32243	9.74403	3.53747	9.7832					75.2754
%/MOY/RCARTP			4.57977	4.36903	2.37621	4.85641	3.3283	1.52341	2.21591	0.0567485	0.449374	2.37893					82.9251
																	88.4205
Value	c-	c+	ATB	[5 mg/ml]	[2,5 mg/ml]	[1,25 mg/ml]	[0,625 mg/ml]	[0,312 mg/ml]	[0,156 mg/ml]	[0,078mg/ml]	[0,039mg/ml]	[0,019 mg/ml]					75.2754	4.57977	82.9251	4.40094	88.4205	1.08123
A	0.297924	0.84165	0.644303	0.294179	0.342183	0.429386	0.479741	0.537221	0.761934	0.711377	0.729431	0.715531	CuO	TM
B	0.246659	0.969649	0.492692	0.246574	0.367099	0.506061	0.53055	0.576887	0.860292	0.600392	0.638469	0.709147	CuO	TM
C	0.268065	2.50699	0.470209	0.263026	0.418861	0.610469	1.03965	0.777928	0.766322	0.681737	0.778432	0.840894	CuO	TM
D	0.40779	2.66563	0.6196	0.377476	0.410526	4.75835	0.506024	1.77002	0.825277	0.531701	0.642033	0.827803	CuO	TM
E	0.758815	0.984133	0.38564	0.325434	3.05656	5.22795	0.940657	2.28139	2.26414	0.808741	1.80565	1.20594	AgNPs	TM
F	0.268486	1.37354	0.390029	0.212104	0.291171	1.50043	0.634156	0.910849	0.847975	0.645157	1.17413	0.781988	AgNPs	TM
G	0.279791	1.20806	0.556533	0.248454	0.442558	0.465792	0.726257	1.26934	1.08286	1.04778	1.16044	1.31079	AgNPs	TM
H	0.326788	1.83157	0.549826	0.274367	0.338182	1.1184	0.851789	1.41602	1.11831	1.23919	0.751905	0.851474	AgNPs	TM
moyenne pour AgNPs	0.281286	1.20143	0.387834	0.325434	0.39037	0.792096	0.788215	0.910849	1.01638	1.0319	1.02883	1.03755
		0.920148	0.106549	0.0441485	0.109084	0.510811	0.506929	0.629563	0.735096	0.750618	0.74754	0.756262
inhibition %			88.4205	95.202	88.1449	44.4861	44.9079	31.5802	20.1111	18.4242	18.7588	17.8108
ecartype			0.00474257	0.0257033	0.0332418	0.270136	0.109244	0.253491	0.0250669	0.135347	0.239917	0.324785
moy/ecrtyp			81.7774	12.6612	11.7433	2.93221	7.2152	3.59321	40.5467	7.62412	4.28825	3.19456
%/MOY/RCARTP			1.08123	7.51922	7.50594	15.1715	6.22406	8.78884	0.495999	2.41657	4.37447	5.57534
Value	c-	c+	ATB	[5 mg/ml]	[2,5 mg/ml]	[1,25 mg/ml]	[0,625 mg/ml]	[0,312 mg/ml]	[0,156 mg/ml]	[0,078mg/ml]	[0,039mg/ml]	[0,019 mg/ml]
A	0.169225	1.0006	0.371157	0.15444	0.154632	0.667966	1.10764	0.872444	1.82739	2.45738	1.6493	1.88254	CuO	TP
B	0.143591	1.34009	0.326742	0.164594	0.207059	0.450661	1.22128	1.60498	1.78182	1.77823	1.04883	1.07015	CuO	TP
C	0.171373	0.75079	0.307269	0.149807	0.174715	0.37325	1.53108	1.56418	1.30519	1.45388	1.86238	2.34047	CuO	TP
D	0.136342	0.789651	0.291839	0.148866	0.190363	0.760519	0.831348	1.60299	1.34018	1.88956	1.30725	0.97159	CuO	TP
E	0.130953	1.38407	0.301465	0.134198	0.137993	0.142525	0.133637	0.218824	0.155282	0.213739	0.947002	1.17593	AgNPs	TP
F	0.189459	3.63505	0.336678	0.133877	0.131898	0.141437	0.150615	0.164603	0.187723	0.898919	6	4.84182	AgNPs	TP
G	0.125368	1.47883	0.363988	0.160467	0.130375	0.141126	0.161766	0.156001	0.165409	0.22666	0.436868	1.48602	AgNPs	TP
H	0.13376	0.522403	0.330865	0.137666	0.164344	0.145279	0.142309	0.154682	0.152429	0.214093	0.39806	1.36737	AgNPs	TP
moyenne pour AgNPs	0.134003	1.3009	0.333249	0.135247	0.141153	0.143203	0.146462	0.164603	0.165409	0.214093	0.417464	1.17593
		1.16689	0.199246	0.0012442	0.0071497	0.0091997	0.0124592	0.0306002	0.0314062	0.0800902	0.283461	1.04193
inhibition %			82.9251	99.8934	99.3873	99.2116	98.9323	97.3776	97.3086	93.1365	75.7081	10.7094
ecartype			0.017686	0.00267923	0.00107692	0.00293661	0.0097631	0.0340603	0.00917825	0.00888621	0.0274414	0.0838982
moy/ecrtyp			18.8426	50.4798	131.07	48.7645	15.0016	4.83269	18.0219	24.0927	15.2129	14.0161
%/MOY/RCARTP			4.40094	1.97888	0.758276	2.03451	6.59479	20.1498	5.39948	3.86575	4.97656	0.764076

## Sheet: Staph aures
Value	c-	c+	ATB	[5 mg/ml]	[2,5 mg/ml]	[1,25 mg/ml]	[0,625 mg/ml]	[0,312 mg/ml]	[0,156 mg/ml]	[0,078mg/ml]	[0,039mg/ml]	[0,019 mg/ml]
A	0.202874	0.863495	0.451314	0.542506	0.468608	1.02312	1.20477	0.928327	0.925731	1.15951	0.964523	1.13617	CuO	EG
B	0.19724	1.17829	0.355153	0.550433	0.542687	0.83284	1.3574	0.949589	0.934922	1.13506	1.05183	1.02106	CuO	EG		Pg		Tp		TM
C	0.198103	0.978034	0.359684	0.551721	0.697275	1.57621	1.46542	0.870248	1.28281	1.01484	1.05174	0.899102	CuO	EG	cc (mg/mL)	%	SD	%	SD	%	SD
D	0.163773	0.91038	0.385435	0.433422	0.640644	0.598436	1.35328	0.874913	1.10291	1.03445	1.12513	1.04538	CuO	EG	0.019	3.55199	0.75055	18.4	0.73276	5.5869	0.701887
E	0.177879	0.856503	0.464384	0.794821	0.81246	0.882037	0.74057	0.934714	0.87106	0.837431	1.04104	1.10343	AgNPs	EG	0.039	4.66	1.13441	36.59	1.45856	8.20211	1.32976
F	0.195607	1.15307	0.346652	0.793487	1.06515	0.79451	0.85461	0.793529	1.00338	0.742526	0.926689	0.935314	AgNPs	EG	0.078	9.43	0.601125	48.8	0.0380146	9.2714	0.486778
G	0.196008	0.831342	0.418901	0.73712	1.32248	0.9898	0.97101	0.84004	0.935582	0.949379	1.07303	1.11575	AgNPs	EG	0.156	11.84	2.329	73.64	6.09154	9.61804	0.731042
H	0.230441	0.93155	0.419015	0.792381	1.0775	1.31882	1.46144	1.0698	1.17778	1.02952	1.369	1.3301	AgNPs	EG	0.312	13.77	1.1579	80.05	1.28383	9.86753	2.85672
moyenne pour AgNPs	0.188102	0.962832	0.412238	0.779452	0.81246	0.838274	0.855397	0.856094	0.87106	0.889714	0.926689	0.935314			0.625	16.7	1.33435	88.1	0.488257	14.0956	2.29894
		0.774731	0.224136	0.591351	0.624358	0.650172	0.667295	0.667993	0.682958	0.701612	0.738587	0.747212			1.25	19.4	2.64852	91.27	0.412963	31.6297	1.6394
inhibition %			71.0691	23.6702	19.4096	16.0777	13.8675	13.7774	11.8457	9.43791	4.66528	3.55199			2.5	23.67	4.34701	92.42	0.11126	57.3356	2.32859
ecartype			8.06102e-05	0.00078206	0.18196	0.138091	0.0823072	0.0719486	0.17126	0.0566682	0.225334	0.197636			5	71.06	0.0237494	92.78	0.546318	81.5642	2.83671
moy/ecrtyp			5113.97	996.665	4.46505	6.07045	10.3927	11.8987	5.08619	15.7004	4.11251	4.73252			CHL	71.0691	2.59883	82.895	2.59883	61.482	0.301153
%/MOY/RCARTP			0.0138971	0.0237494	4.34701	2.64852	1.33435	1.1579	2.329	0.601125	1.13441	0.75055				71.0691	71.8154
																82.895	10.7259
																61.482
Value	c-	c+	ATB	[5 mg/ml]	[2,5 mg/ml]	[1,25 mg/ml]	[0,625 mg/ml]	[0,312 mg/ml]	[0,156 mg/ml]	[0,078mg/ml]	[0,039mg/ml]	[0,019 mg/ml]
A	0.23169	1.10593	0.32219	0.25785	0.250261	0.348955	0.471678	0.535102	0.835321	0.941594	0.874776	0.943405	CuO	TP
B	0.155931	1.09327	0.421636	0.231708	0.248427	0.324748	0.48972	0.751717	0.459792	0.882296	1.20279	0.761996	CuO	TP
C	0.194787	1.0494	0.447056	0.20493	0.314362	0.333604	0.550149	0.567702	0.514276	0.990052	1.23931	1.07256	CuO	TP
D	0.272957	1.00588	0.399999	0.22764	0.217188	0.353057	0.544292	0.646126	0.551589	0.894851	1.00855	0.890262	CuO	TP
E	0.182406	0.832823	0.340167	0.270573	0.244461	0.249057	0.31628	0.361334	0.332792	0.808373	0.917455	0.804446	AgNPs	TP
F	0.162093	0.913412	0.354334	0.24311	0.24533	0.250669	0.251078	0.312391	0.375953	0.503571	0.718864	0.836498	AgNPs	TP
G	0.15926	0.921672	0.311293	0.176582	0.245743	0.183185	0.28944	0.353568	0.410868	0.640462	0.696583	0.890104	AgNPs	TP
H	0.136983	0.90335	0.272329	0.268577	0.234886	0.256064	0.253253	0.404547	0.456972	0.639807	0.663938	0.828657	AgNPs	TP
moyenne pour AgNPs	0.181507	0.988424	0.319531	0.23971	0.242605	0.25193	0.277513	0.342431	0.394146	0.594613	0.693128	0.839926
		0.806916	0.138023	0.0582031	0.0610976	0.0704226	0.0960053	0.160924	0.212639	0.413106	0.511621	0.658419
inhibition %			82.895	92.787	92.4283	91.2726	88.1022	80.057	73.648	48.8044	36.5955	18.4031
ecartype			0.0100176	0.00141139	0.000292035	0.00113986	0.00153796	0.00549139	0.0326005	0.000463155	0.0276255	0.0334435
moy/ecrtyp			31.897	169.841	830.739	221.019	180.442	62.3578	12.0902	1283.83	25.0902	25.1148
%/MOY/RCARTP			2.59883	0.546318	0.11126	0.412963	0.488257	1.28383	6.09154	0.0380146	1.45856	0.73276
Value	c-	c+	ATB	[5 mg/ml]	[2,5 mg/ml]	[1,25 mg/ml]	[0,625 mg/ml]	[0,312 mg/ml]	[0,156 mg/ml]	[0,078mg/ml]	[0,039mg/ml]	[0,019 mg/ml]
A	0.185553	1.11412	0.494812	0.319829	0.457403	0.941618	1.33982	1.43218	1.17441	1.20023	1.10658	0.975597	CuO	TM
B	0.196248	1.08188	0.617784	0.319293	0.498047	0.764914	0.902755	1.64529	1.57498	1.04915	1.10784	1.06483	CuO	TM
C	0.183427	1.0097	0.503874	0.270159	0.439594	0.732214	0.853766	1.54523	1.30941	0.848305	1.10142	1.01777	CuO	TM
D	0.17354	1.06706	0.601546	0.283031	0.43409	0.768157	0.837549	1.68968	1.16491	0.84919	0.965124	1.07156	CuO	TM
E	0.174939	1.0522	0.559758	0.363284	0.760602	1.01592	1.29398	1.29106	1.11477	0.987755	1.17863	1.09363	AgNPs	TM
F	0.167388	0.964828	0.563649	0.443486	0.586936	0.953127	1.30394	1.31659	1.07414	0.996223	1.12174	0.970717	AgNPs	TM
G	0.186823	1.15397	0.519737	0.381152	0.552321	0.936442	1.05643	0.85229	1.33413	1.03756	1.08813	1.14377	AgNPs	TM
H	0.236975	1.23942	0.484246	0.300911	0.668759	0.856656	1.00337	1.36317	1.21867	1.11757	1.4091	1.24776	AgNPs	TM
moyenne pour AgNPs	0.181131	1.16917	0.561703	0.363284	0.602672	0.856656	1.0299	1.07167	1.07414	1.07756	1.08813	1.11397
		0.988039	0.380572	0.182153	0.421541	0.675525	0.848769	0.890544	0.893009	0.896434	0.906999	0.932838
inhibition %			61.482	81.5642	57.3356	31.6297	14.0956	9.86753	9.61804	9.2714	8.20211	5.5869
ecartype			0.00275135	0.0126346	0.0244765	0.0444014	0.167973	0.310257	0.0816425	0.0565756	0.176412	0.139949
moy/ecrtyp			204.155	28.7531	24.6225	19.2935	6.13133	3.45415	13.1566	19.0465	6.16812	7.95983
%/MOY/RCARTP			0.301153	2.83671	2.32859	1.6394	2.29894	2.85672	0.731042	0.486778	1.32976	0.701887

## Sheet: Ago curative
Value	c-	C+ Sans lavage	c+ avec lavage	ATB	5mg/ml	2,5mg/ml	1,25mg/ml	0,625mg/ml	0,3125mg/ml	0,15625mg/ml	0,078125mg/ml	0,0390625mg/ml				TP		TM
A	0.423436	1.368	6	0.743747	0.588283	0.836704	1.01846	0.634292	0.584927	0.408713	0.616264	2.97506	AgNPs	TP	cc (mg/mL)	%	SD	%	SD
B	0.273388	1.60833	0.847684	0.419327	0.583066	0.725235	1.02192	0.808949	0.447931	0.450635	0.566877	2.70626	AgNPs	TP	0.019
C	0.287955	1.67295	1.60199	0.42456	0.482139	1.08259	0.728266	0.627053	0.483357	0.456864	0.621877	0.683625	AgNPs	TP	0.039	33.5819	3.86637	76.3425	4.69405
D	0.285417	1.93631	0.512975	0.588948	0.467571	0.707968	0.726089	0.489197	0.473106	0.893924	0.549208	1.28578	AgNPs	TP	0.078	45.8364	1.87582	77.5193	1.59042
E	0.261827	1.53056	3.75948	0.608864	1.53653	1.79261	1.10161	0.619581	0.575682	0.935776	1.18724	1.11923	AgNPs	TP	0.156	50.9392	1.57621	79.596	4.29844
F	0.171662	1.13041	0.341937	0.403325	0.493724	0.609972	0.583788	0.430895	0.406421	0.949969	0.444269	0.741515	AgNPs	TP	0.312	50.5489	1.11573	86.1077	0.953283
G	0.168725	2.29201	5.2029	0.556507	1.27639	1.16518	1.19287	0.685395	0.605119	0.870269	1.03291	1.39113	AgNPs	TP	0.625	63.1191	2.76829	86.6495	1.43094
H	0.313053	5.55978	2.55282	2.87503	1.2193	1.64518	1.15735	0.644011	1.53784	0.402888	0.944756	0.916092	AgNPs	TP	1.25	63.1673	0.143127	88.1603	5.52836
moyenne pour AgNPs	0.251718	1.64837	1.41281	0.53504	0.522957	0.681058	0.679381	0.67994	0.825892	0.82136	0.880609	1.0229			2.5	63.0228	7.29378	91.6537	6.19725
		1.39665	1.1611	0.283322	0.271238	0.42934	0.427663	0.428222	0.574174	0.569642	0.628891	0.771177			5	76.6394	1.50963	91.9825	3.29571
inhibition %				75.5988	76.6394	63.0228	63.1673	63.1191	50.5489	50.9392	45.8364	33.5819			CHL	75.5988	3.24122
ecartype			2.43379	0.0229393	0.0103011	0.0788205	0.00153937	0.0298209	0.0182294	0.254154	0.0360383	0.117769
moy/ecrtyp			0.5805	23.3242	50.7669	8.64063	441.337	22.8008	45.3055	3.23174	24.4354	8.68563
%/MOY/RCARTP			0	3.24122	1.50963	7.29378	0.143127	2.76829	1.11573	15.7621	1.87582	3.86637
Value	c-	C+ Sans lavage	c+ avec lavage	ATB	5mg/ml	2,5mg/ml	1,25mg/ml	0,625mg/ml	0,3125mg/ml	0,15625mg/ml	0,078125mg/ml	0,0390625mg/ml
A	0.533319	1.79648	2.66849	1.51916	0.420753	0.454398	0.470001	0.680999	0.465167	1.26145	0.5314	0.518481	AgNPs	TM
B	0.301771	1.78912	0.697673	0.940133	0.342534	0.348018	0.431101	0.444948	0.842833	0.414154	0.413543	0.73419	AgNPs	TM
C	0.234727	1.2642	0.802442	0.980547	0.265228	0.412847	0.393001	0.765778	1.03402	0.402366	0.437551	0.449654	AgNPs	TM
D	0.162881	1.05654	0.480454	0.440986	0.371522	0.372162	0.77288	1.55483	2.05681	0.45956	0.423319	0.352591	AgNPs	TM
E	0.169264	1.60252	3.78982	0.574699	0.463173	0.645283	0.730394	0.440865	0.393667	0.584265	0.626264	0.356954	AgNPs	TM
F	0.179098	1.2486	0.775201	0.47661	0.352022	0.35179	0.435089	0.381246	0.337235	0.328219	0.347836	0.306211	AgNPs	TM
G	0.32274	1.5307	0.829305	0.832584	0.483421	0.472494	0.522269	0.451606	0.385636	0.618911	1.52549	0.397121	AgNPs	TM
H	0.725425	3.92457	6	2.94533	0.380035	0.314548	0.380397	0.351495	0.378316	0.404713	0.402118	0.562347	AgNPs	TM
moyenne pour AgNPs	0.271971	1.67971	0.776155	0.707593	0.384836	0.389465	0.438643	0.459911	0.467537	0.559205	0.58844	0.605006
		1.40773	0.504184	0.435622	0.112865	0.117494	0.166672	0.187939	0.195566	0.287233	0.316469	0.333035
inhibition %				69.0551	91.9825	91.6537	88.1603	86.6495	86.1077	79.596	77.5193	76.3425
ecartype			3.00104	0.02519	0.0137886	0.0263341	0.0275065	0.00759503	0.00517602	0.0301988	0.0120727	0.0371998
moy/ecrtyp			0.258629	28.0903	27.9098	14.7894	15.9469	60.5541	90.3276	18.5174	48.7413	16.2637
%/MOY/RCARTP			0	2.45833	3.29571	6.19725	5.52836	1.43094	0.953283	4.29844	1.59042	4.69405

## Sheet: Cytotoxic effect
	mg/mL	[C] µg/ml	Pg-AgONPs						Average	SD	Tp-AgONPs						Average	SD	Tm-AgONPs						Average	SD
	0	0	100	100	100	100	100	100	100	0	100	100	100	100	100	100	100	0	100	100	100	100	100	100	100	0
	0.039	3.90625	92.8513	95.0752	96.3593	100.098	94.9656	88.5038	94.6423	3.84443	73.6936	68.137	76.0024	74.1531	77.7317	96.3177	77.6726	9.69105	100.064	77.6603	84.8054	82.2482	76.3504	65.7857	81.1523	11.3453
	0.078	7.8125	91.5618	79.6662	86.4673	86.6718	81.9528	83.4754	84.9659	4.19662	78.7242	69.5441	72.2319	80.7853	78.0164	86.0197	77.5536	5.93593	78.6459	70.6796	78.2677	71.9116	71.8654	71.5441	73.8191	3.62148
	0.156	15.625	87.2943	83.5158	87.1357	85.7321	83.4781	76.9629	84.0198	3.83955	71.1579	68.4751	79.8725	80.1299	89.2269	84.213	78.8459	7.82218	82.8956	67.5579	66.8968	75.7669	69.4317	65.7232	71.3787	6.66868
	0.312	31.25	76.6144	79.9983	78.9743	90.5709	84.341	77.296	81.2991	5.29692	62.0199	74.5612	73.9351	69.8797	75.635	70.4148	71.0743	4.99974	81.2359	63.0717	71.4607	70.0911	64.7071	66.676	69.5404	6.545
	0.625	62.5	86.3134	83.7249	83.4431	75.1031	84.9015	78.1402	81.9377	4.34796	56.255	55.5769	47.5686	49.558	51.2578	57.5585	52.9625	4.0593	79.1818	74.0168	67.1299	65.6116	70.015	65.5366	70.2486	5.43114
	1.25	125	74.3942	73.3411	73.8509	72.2837	67.1397	71.5033	72.0855	2.64056	41.25	39.14	40.2403	36.1764	36.3894	40.0853	38.8802	2.12132	74.8273	67.984	66.1874	70.3792	63.9559	71.2514	69.0975	3.87962
	2.5	250	66.1069	63.0558	67.7051	67.719	68.3952	69.2183	67.0334	2.20134	31.714	30.7034	29.2201	29.6201	28.0007	32.7527	30.3352	1.73701	72.43	59.1053	65.5029	63.7191	65.3236	66.9243	65.5009	4.33933
	5	500	26.7336	25.8917	51.6504	26.5451	26.8118	29.3913	31.1706	10.1048	30.2032	29.6689	30.1306	27.842	31.2117	29.8322	29.8147	1.10593	73.6312	60.5407	61.4135	59.9537	62.3037	66.1268	63.9949	5.1998
	10	1000	25.2403	24.9757	24.0474	24.1573	25.0624	25.4415	24.8208	0.580002	30.5816	29.7163	31.0289	30.4396	30.4445	30.7886	30.4999	0.445104	19.7991	18.2994	25.0904	27.2336	22.3145	30.0216	23.7931	4.48628
		[C] µg/ml	Pg-AgONPs	SD	Tp-AgONPs	SD	Tm-AgONPs	SD
		0	100	0	100	0	100	0
		62.5	81.9377	4.34796	52.9625	4.0593	70.2486	5.43114
		125	72.0855	2.64056	38.8802	2.12132	69.0975	3.87962
		250	67.0334	2.20134	30.3352	1.73701	65.5009	4.33933
		500	31.1706	10.1048	29.8147	1.10593	63.9949	5.1998
		1000	24.8208	0.580002	30.4999	0.445104	23.7931	4.48628
	IC50		273.15		43.6873
			260.32		47.84
			266.735	9.07218	45.7636	2.9364
		0	100
		62.5	70.2486
		125	69.0975
		250	65.5009
		500	63.9949
		1000	23.7931
